# Supplementary material for: A Machine Learning–Based Algorithm for the Prediction of Intensive Care Unit Delirium (PRIDE): Retrospective Study
Source: PubMed Central journal article supplement (PMC8367129; doi:10.2196/23401), 2021-07-26

**NOTIFICATION LETTER**  
**OF SMC IRB REVIEW SUMMARY**

Investigator : Cha, Wonchul, M.D.  
Assistant Professor, Department of Emergency Medicine, SMC  
SMC IRB File No. : 2020-02-026  
Protocol Title : Development of delirium prediction algorithm after hospitalization,  
using the initial admission data from ICU

**Exempt**

Not exempt

\* Please append details or summarize reason(s) for determination below:

The objective of this research is to develop delirium prediction algorithm after hospitalization, using the initial admission data from ICU by collecting the data retrospectively. The initial admission data are properly de-identified by CDW (clinical data warehouse). Therefore, it meets the IRB exemption research category 3.

\* Investigator does not need to submit continuing review or other IRB related reviews to the IRB.

\* If investigator needs to revise research protocol which goes beyond IRB exemption research scope, he/she should re-submit the initial project to the IRB.

**Date of Confirmation : Feb. 13, 2020**

Institutional Review Board  
Samsung Medical Center  
#81, Irwon-Ro, Gangnam-Gu, Seoul, Korea, 135-710

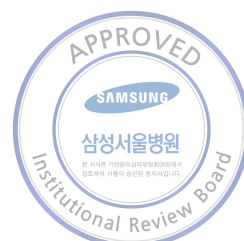

## CONTENTS OF IRB REVIEW

Investigator : Cha, Wonchul, M.D.  
Assistant Professor, Department of Emergency Medicine, SMC  
SMC IRB File No. : 2020-02-026  
Protocol Title : Development of delirium prediction algorithm after hospitalization,  
using the initial admission data from ICU

### DOCUMENT REVIEWED

1. Delirium Protocol\_ver2.0 200206  
- Justification of ICF waivers
2. Delirium CRF ver.2.0(20.02.06)
3. Investigator Declaration Form \_ver 4.0\_200108
4. PI's CV
5. A Request Form for IRB Expedited Review\_ver1.0 200206
6. Publication Plan

Issued by



Seil Jang  
IRB Secretary for Administration  
Samsung Medical Center

Aug. 27, 2020  
Date

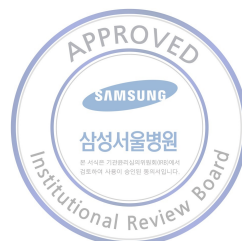

## IRB Information

Institution : Samsung Medical Center (SMC)  
Address : #81 Irwon-ro, Gangnam-gu, Seoul, Korea  
IRB President : Prof. Hojoong Kim, M.D., Ph.D.  
Dept. of Pulmonary and critical care medicine

SMC IRB abides by the guideline of ICH and GCP.

SMC IRB and the Institution are registered at Office for Human Research Protections (OHRP), U.S. Dept. of Health & Human Services, U.S.A..

Related SMC IRB registration and accreditation information is as follows.

\* Identifier No. (U.S. OHRP)

Organization : IORG0000545 - Samsung Med Ctr  
Assurance : FWA00002750  
IRBs : IRB #1 : IRB00000877  
IRB #2 : IRB00005489  
IRB #3 : IRB00005490  
IRB #4 : IRB00005491  
IRB #5 : IRB00006642  
IRB #6 : IRB00006643  
IRB #7 : IRB00008480  
IRB #8 : IRB00008481  
IRB #9 : IRB00011389  
IRB#10 : IRB00011390

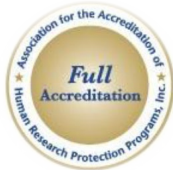

\*

Samsung Medical Center has earned the accreditation from the Association for the Accreditation of Human Research Protection Programs, Inc. (AAHRPP) on June 16, 2006.

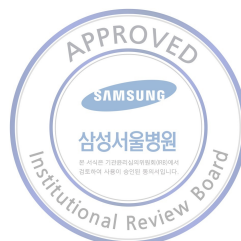

Supplement: medinform_v9i7e23401_app1.pdf [file medinform_v9i7e23401_app1.pdf]
